# Supplementary material
Source: Springer Nature journal article supplement (https://www.springermedizin.de/resource/supplementary/12936_2007_530_MOESM3_ESM.pdf/9548204)
Supplement: MOESM3 [file 9548204]

No. at risk

|      | 0   | 7   | 14  | 21  | 28  |
|------|-----|-----|-----|-----|-----|
| CQ   | 320 | 274 | 205 | 162 | 137 |
| SP   | 383 | 365 | 354 | 350 | 346 |
| AQ   | 385 | 373 | 357 | 352 | 344 |
| ASAQ | 346 | 236 | 332 | 328 | 318 |
